# Supplementary material
Source: HighWire-hosted journal article supplement (https://jitc.bmj.com/content/9/1/e001519)

| Number of ERV repeats analysed | Number of ERV repeats associated with survival advantage | Number of ERV repeats associated with survival disadvantage | Number of ERV families associated with survival advantage | Number of ERV families associated with survival disadvantage | Number of ERV families exclusively associated with survival advantage | Number of ERV families exclusively associated with survival disadvantage |
|--------------------------------|----------------------------------------------------------|-------------------------------------------------------------|-----------------------------------------------------------|--------------------------------------------------------------|-----------------------------------------------------------------------|--------------------------------------------------------------------------|
| 25,207                         | 226                                                      | 272                                                         | 115                                                       | 132                                                          | 59                                                                    | 76                                                                       |

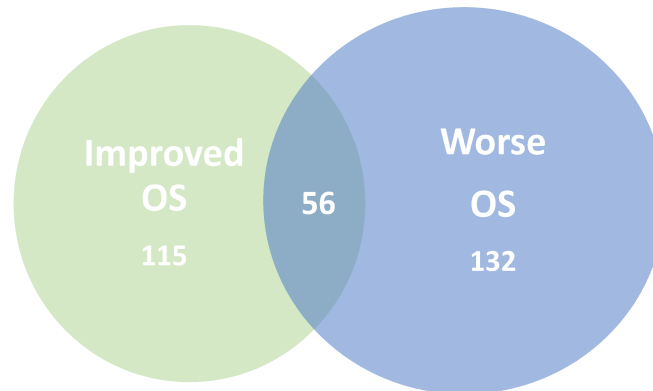

Supplement: inline-supplementary-material-3 [file inline-supplementary-material-3.pdf]
