# Supplementary material
Source: HighWire-hosted journal article supplement (https://jitc.bmj.com/content/9/1/e001519)

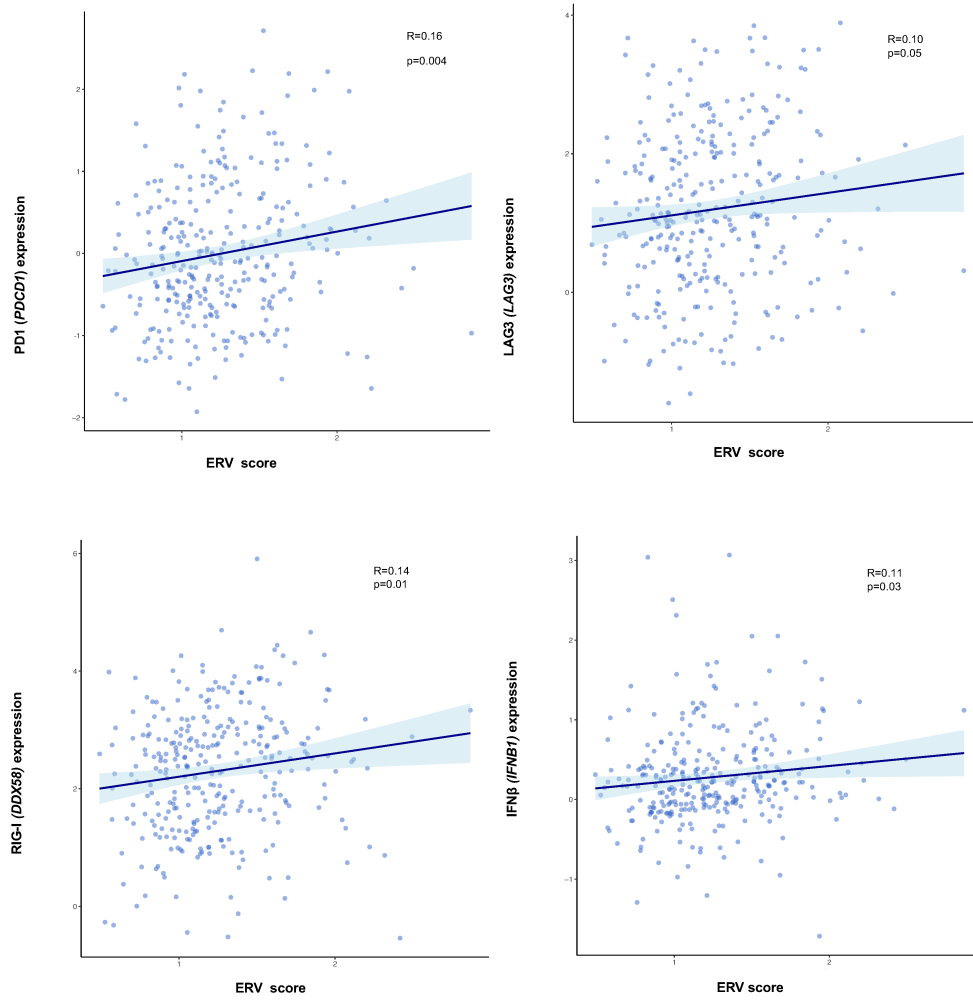

Supplement: inline-supplementary-material-8 [file inline-supplementary-material-8.pdf]
