# Supplementary material
Source: HighWire-hosted journal article supplement (https://jitc.bmj.com/content/9/1/e001519)
Supplement: inline-supplementary-material-10 [file inline-supplementary-material-10.pdf]

| Function           | Package     | Source                                                                                                                                              | Purpose                                                                 |
|--------------------|-------------|-----------------------------------------------------------------------------------------------------------------------------------------------------|-------------------------------------------------------------------------|
| useEnsembl         | biomaRt     | <a href="https://bioconductor.org/packages/release/bioc/html/biomaRt.html">https://bioconductor.org/packages/release/bioc/html/biomaRt.html</a>     | Annotation of gene names                                                |
| rpkm               | edgeR       | <a href="http://bioconductor.org/packages/release/bioc/html/edgeR.html">http://bioconductor.org/packages/release/bioc/html/edgeR.html</a>           | Calculation of RPKM values                                              |
| DGEList            | edgeR       | <a href="http://bioconductor.org/packages/release/bioc/html/edgeR.html">http://bioconductor.org/packages/release/bioc/html/edgeR.html</a>           | Manipulation of read counts for DE analysis                             |
| ggplot             | ggplot2     | <a href="https://cran.r-project.org/web/packages/ggplot2/index.html">https://cran.r-project.org/web/packages/ggplot2/index.html</a>                 | Data visualisation                                                      |
| glmnet             | glmnet      | <a href="https://cran.r-project.org/web/packages/glmnet/index.html">https://cran.r-project.org/web/packages/glmnet/index.html</a>                   | LASSO logistic regression                                               |
| cv.glmnet          | glmnet      | <a href="https://cran.r-project.org/web/packages/glmnet/index.html">https://cran.r-project.org/web/packages/glmnet/index.html</a>                   | LASSO cross-validation                                                  |
| predict            | glmnet      | <a href="https://cran.r-project.org/web/packages/glmnet/index.html">https://cran.r-project.org/web/packages/glmnet/index.html</a>                   | LASSO predictions                                                       |
| voom               | limma       | <a href="https://bioconductor.org/packages/release/bioc/html/limma.html">https://bioconductor.org/packages/release/bioc/html/limma.html</a>         | Transformation of RNA-seq data for linear modelling                     |
| lmFit              | limma       | <a href="https://bioconductor.org/packages/release/bioc/html/limma.html">https://bioconductor.org/packages/release/bioc/html/limma.html</a>         | Fitting linear models for RNA-seq data                                  |
| eBayes             | limma       | <a href="https://bioconductor.org/packages/release/bioc/html/limma.html">https://bioconductor.org/packages/release/bioc/html/limma.html</a>         | Empirical Bayes statistics for DE analysis                              |
| pheatmap           | pheatmap    | <a href="https://cran.r-project.org/web/packages/pheatmap/index.html">https://cran.r-project.org/web/packages/pheatmap/index.html</a>               | Plotting heatmaps                                                       |
| featureCounts      | Rsubread    | <a href="https://bioconductor.org/packages/release/bioc/html/Rsubread.html">https://bioconductor.org/packages/release/bioc/html/Rsubread.html</a>   | Assigning mapped sequencing reads to genomic features                   |
| cor/cor.test       | stats       | <a href="https://cran.r-project.org/web/packages/STAT/index.html">https://cran.r-project.org/web/packages/STAT/index.html</a>                       | Calculating correlation coefficients                                    |
| survfit            | survival    | <a href="https://cran.r-project.org/web/packages/survival/index.html">https://cran.r-project.org/web/packages/survival/index.html</a>               | Computing an estimate of a survival curve using the Kaplan-Meier method |
| coxph              | survival    | <a href="https://cran.r-project.org/web/packages/survival/index.html">https://cran.r-project.org/web/packages/survival/index.html</a>               | Computing Cox proportional hazards models                               |
| draw.pairwise.venn | VennDiagram | <a href="https://cran.r-project.org/web/packages/VennDiagram/index.html">https://cran.r-project.org/web/packages/VennDiagram/index.html</a>         | Plotting Venn diagrams                                                  |
| viridis            | viridis     | <a href="https://cran.r-project.org/web/packages/viridis/index.html">https://cran.r-project.org/web/packages/viridis/index.html</a>                 | Colour palettes                                                         |
| cpgDensityCalc     | Repitools   | <a href="https://bioconductor.org/packages/release/bioc/html/Repitools.html">https://bioconductor.org/packages/release/bioc/html/Repitools.html</a> | CpG density calculations                                                |
